# Supplementary material for: Unfoldomics of prostate cancer: on the abundance and roles of intrinsically disordered proteins in prostate cancer
Source: PubMed Central journal article supplement — Asian J Androl. 2016 Jul 19;18(5):662–72. doi: 10.4103/1008-682X.184999 (PMC5000786; doi:10.4103/1008-682x.184999), 2016-07-19
Supplement: AJA-18-662_Suppl1.pdf [file AJA-18-662_Suppl1.pdf]

# Supplementary materials

## Unfoldomics of Prostate Cancer: On the Abundance and Roles of Intrinsically Disordered Proteins in Prostate Cancer

Kevin S. Landau,<sup>1</sup> Insung Na,<sup>1</sup> Ryan O. Schenck,<sup>1</sup> and Vladimir N. Uversky<sup>1,2,3,\*</sup>

<sup>1</sup>Department of Molecular Medicine, Morsani College of Medicine, University of South Florida, Tampa, FL 33612, USA;

<sup>2</sup>USF Health Byrd Alzheimer's Research Institute, Morsani College of Medicine, University of South Florida, Tampa, Florida 33612, USA;

<sup>3</sup>Laboratory of Structural Dynamics, Stability and Folding of Proteins, Institute of Cytology, Russian Academy of Sciences, St. Petersburg, Russia

**\*To whom correspondence should be addressed:** VNU, Department of Molecular Medicine, University of South Florida, 12901 Bruce B. Downs Blvd. MDC07, Tampa, Florida 33612, USA, Tel: 1-813-974-5816; E-mail: [vuversky@health.usf.edu](mailto:vuversky@health.usf.edu)

**Non-redundant list of human proteins related to prostate cancer from “Russian” dataset.**

P32019, Q12907, P11021, P30533, Q9P2E9, P01033, P02787, P07288, Q16548, P07858, P09382, P07737, P04179, P04406, P68871, P15531, P22392, P02788, P06733, O75608, P13804, O75874, P60174, Q02252, P45880, P48735, Q03154, O43809, P14550, P21796, P15121, Q06830, P05164, P69905, P00558, P62937, P35228, P30084, P40939, P02768, P30041, P25787, P14174, Q99798, Q99714, P36952, P20618, Q9BUP3, P68371, P23284, P01009, P61457, P63261, P55084, P30044, Q9BPW8, P34897, P60709, P28838, P60981, P07954, P30101, P14618, P08758, Q9NR45, P04075, Q00796, P78371, O95994, O14933, P21291, P68104, P25398, Q13011, P49411, P49773, Q01469, P02766, P24752, P18669, P00367, P48047, P30042, P25705, P37802, P61088, P30040, Q16836, P00390, O75828, Q9BTZ2, P07355, O14818, P14854, O43678, Q9Y603, P50454, P00915, P04083, Q99497, P10809, P60903, P02794, Q15404, P23528, P61604, P02792, P30046, O60493, P30086, Q8N5N7, Q04760, Q00688, P07108, P17980, Q01995, P02675, P31949, P13693, P06703, P55072, P01857, P38117, P38646, Q9H4G4, P51570, P52597, P51911, P00441, Q7Z6V5, P54819, P62277, O00151, P31948, Q6DCA0, P62987, P31943, P01834, Q9UJ78, P02511, Q9NQ35, Q9HB71, P02647, P24844, O94776, P06702, Q9Y4L1, P20472, Q7LC44, P18206, Q9Y4X0, P04792, O60664, P22466, P11940, Q8N183, Q99878, Q32P51, P04908, P47813, P06899, Q96QV6, P02671, Q99879, Q16778, P62263, P62807, P68431, P17661, Q13526, P84243, O60841, P22626, P09651, P06748, P51991, P08670, Q9UII2, Q96AE4, Q96T37, Q9NX63, P02545, P09429, P06753, P07951, P09493, Q96T23, P67936, P23246, P63162, P38159, Q9H2D6, Q05682, P16949, P08123, Q96IZ7
