# Supplementary material for: Unfoldomics of prostate cancer: on the abundance and roles of intrinsically disordered proteins in prostate cancer
Source: PubMed Central journal article supplement — Asian J Androl. 2016 Jul 19;18(5):662–72. doi: 10.4103/1008-682X.184999 (PMC5000786; doi:10.4103/1008-682x.184999), 2016-07-19
Supplement: AJA-18-662_Suppl2.pdf [file AJA-18-662_Suppl2.pdf]

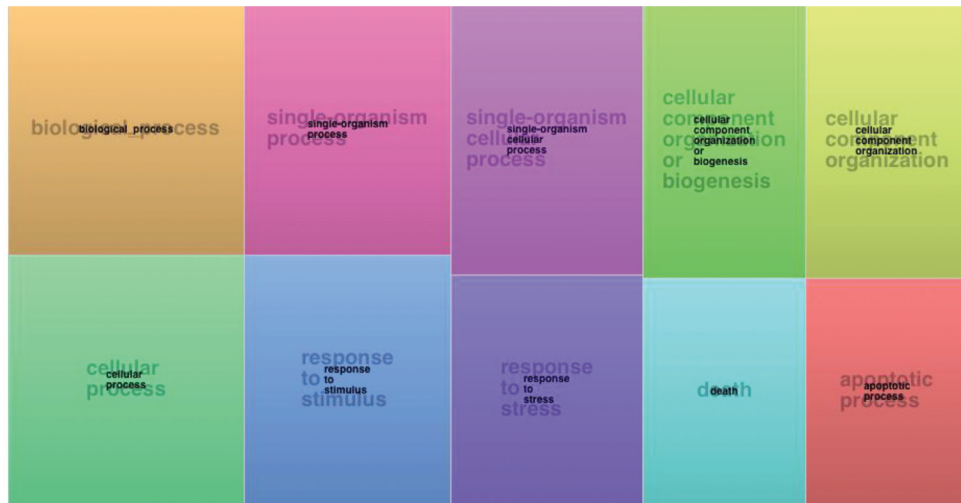

**a**

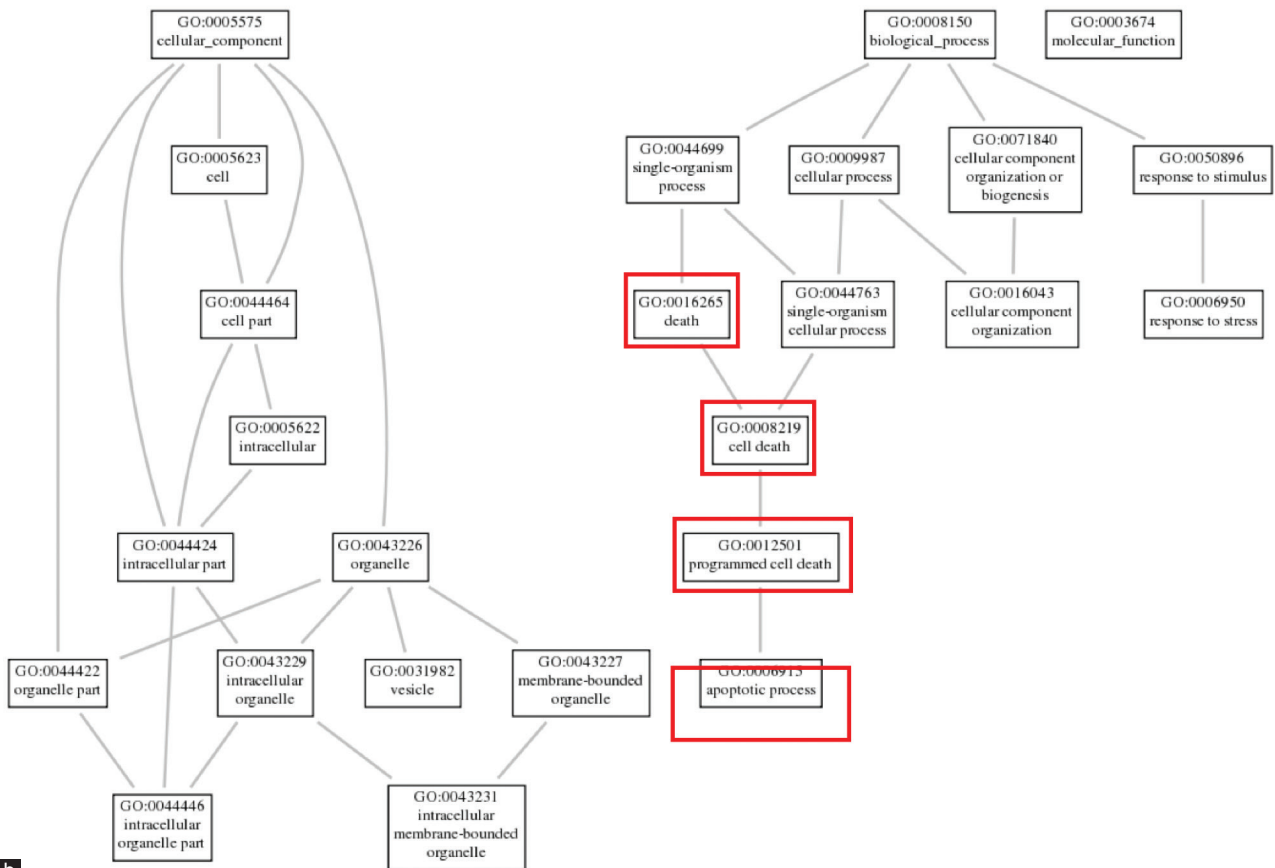

**b**

**Supplementary Figure 1:** Functions of intrinsically disordered proteins related to prostate cancer. **(a)** REVIGO analysis of the cellular process GO terms with  $P < 0.1$ . **(b)** AmiGo2 result for all GO terms with  $P$  value less than 0.1. Highlighted are the programmed cell death-related cellular process GO terms.
