# Supplementary material for: Unfoldomics of prostate cancer: on the abundance and roles of intrinsically disordered proteins in prostate cancer
Source: PubMed Central journal article supplement — Asian J Androl. 2016 Jul 19;18(5):662–72. doi: 10.4103/1008-682X.184999 (PMC5000786; doi:10.4103/1008-682x.184999), 2016-07-19
Supplement: AJA-18-662_Suppl3.pdf [file AJA-18-662_Suppl3.pdf]

**Supplementary Table 7.** Characterization of human proteins involved in the prostate cancer pathway

| Protein                                                | UniProt ID | Protein length (N <sub>AIBS</sub> ) <sup>a</sup> | PONDR-FIT (%) <sup>b</sup> | MobiDB consensus (%) <sup>c</sup> | Location (length) of long disordered regions <sup>d</sup>                                                                                 | Location (length) of AIBSs <sup>e</sup>                                                                                                                                                                                                                                            | N <sub>int</sub> <sup>f</sup> |
|--------------------------------------------------------|------------|--------------------------------------------------|----------------------------|-----------------------------------|-------------------------------------------------------------------------------------------------------------------------------------------|------------------------------------------------------------------------------------------------------------------------------------------------------------------------------------------------------------------------------------------------------------------------------------|-------------------------------|
| BAD, Bcl2-associated agonist of cell death             | Q92934     | 168 (4/70.8)                                     | 100.00                     | 84.54                             | 1-105 (105)<br>122-147 (27)<br>158-168 (11)                                                                                               | 1-53 (53)<br>57-80 (24)<br>100-129 (30)<br>146-157 (12)                                                                                                                                                                                                                            | 66                            |
| CREB5; cyclic AMP-responsive element binding protein 5 | Q02930     | 508 (7/67.9)                                     | 85.24                      | 75.39                             | 46-59 (14)<br>86-393 (308)<br>447-470 (24)<br>479-508 (31)                                                                                | 66-86 (21)<br>99-183 (85)<br>188-358 (171)<br>362-370 (9)<br>378-406 (29)<br>421-444 (24)<br>503-508 (6)                                                                                                                                                                           | 65                            |
| CREB1, cyclic AMP-responsive element-binding protein 1 | P16220     | 341 (7/29.3)                                     | 79.47                      | 40.47                             | 1-32 (32)<br>40-50 (11)<br>102-132 (33)<br>138-171 (34)<br>271-285 (15)                                                                   | 32-44 (13)<br>89-104 (16)<br>128-145 (18)<br>166-191 (26)<br>265-270 (6)<br>307-314 (8)<br>329-341 (13)                                                                                                                                                                            | 169                           |
| FOXO1, Forkhead box protein O1                         | Q12778     | 655 (19/56.9)                                    | 78.63                      | 72.82                             | 1-69 (69)<br>74-101 (28)<br>105-160 (56)<br>199-210 (12)<br>229-336 (107)<br>385-450 (66)<br>463-488 (26)<br>498-569 (72)<br>644-655 (12) | 1-32 (32)<br>54-82 (29)<br>88-118 (31)<br>160-172 (13)<br>182-196 (15)<br>216-226 (11)<br>258-280 (23)<br>289-297 (9)<br>306-314 (9)<br>323-365 (43)<br>371-388 (18)<br>301-409 (8)<br>447-469 (23)<br>483-517 (35)<br>528-545 (18)<br>550-565 (16)<br>570-592 (23)<br>605-612 (8) | 68                            |
| TCF7L1, transcription factor 7 like 1                  | Q9HCS4     | 588 (16/54.5)                                    | 77.04                      | 61.90                             | 1-104 (104)<br>161-183 (23)<br>192-238 (47)<br>316-344 (29)<br>406-512 (107)<br>524-546 (21)                                              | 1-46 (46)<br>53-74 (22)<br>94-135 (42)<br>146-159 (14)<br>191-201 (11)<br>234-252 (19)<br>274-288 (15)<br>349-371 (23)<br>373-383 (11)<br>407-415 (9)<br>444-463 (20)<br>470-494 (25)<br>498-505 (8)<br>511-529 (19)<br>541-558 (18)<br>566-583 (18)                               | 4                             |
| p27Kip1 (CDKN1B), cyclin-dependent kinase              | P46527     | 198 (8/58.6)                                     | 76.77                      | 90.40                             | 1-37 (37)<br>50-67 (18)                                                                                                                   | 1-8 (8)<br>27-37 (11)                                                                                                                                                                                                                                                              | 100                           |

|                                                                                    |        |                    |       |       |                                                                                                                                                                                          |                                                                                                                                                                                                                                                                                                                                                                                                                                                                                                                                                                                       |     |
|------------------------------------------------------------------------------------|--------|--------------------|-------|-------|------------------------------------------------------------------------------------------------------------------------------------------------------------------------------------------|---------------------------------------------------------------------------------------------------------------------------------------------------------------------------------------------------------------------------------------------------------------------------------------------------------------------------------------------------------------------------------------------------------------------------------------------------------------------------------------------------------------------------------------------------------------------------------------|-----|
| inhibitor 1B                                                                       |        |                    |       |       | 81-198 (118)                                                                                                                                                                             | 59-67 (9)<br>80-90 (11)<br>98-105 (8)<br>109-134 (26)<br>140-157 (18)<br>174-198 (35)                                                                                                                                                                                                                                                                                                                                                                                                                                                                                                 |     |
| LEF1, lymphoid enhancer-binding factor 1                                           | Q9UJU2 | 399<br>(8/62.7)    | 74.4  | 66.92 | 1-104 (104)<br>136-148 (13)<br>161-201 (41)<br>240-301 (62)<br>369-399 (31)                                                                                                              | 1-84 (84)<br>99-121 (23)<br>125-131 (7)<br>142-165 (24)<br>193-247 (55)<br>258-269 (12)<br>276-283 (8)<br>300-336 (37)                                                                                                                                                                                                                                                                                                                                                                                                                                                                | 58  |
| IKBKG, inhibitor of kappa light polypeptide gene enhancer in B-cells, kinase gamma | Q9Y6K9 | 419<br>(6/15.8)    | 73.03 | 24.58 | 15-35 (21)<br>171-190 (20)<br>356-396 (41)                                                                                                                                               | 1-15 (15)<br>33-41 (9)<br>230-242 (13)<br>304-310 (7)<br>372-380 (9)<br>407-419 (13)                                                                                                                                                                                                                                                                                                                                                                                                                                                                                                  | 440 |
| CREBBP, CREB-binding protein                                                       | Q92793 | 2,442<br>(34/53.4) | 67.12 | 66.01 | 1-48 (48)<br>51-246 (196)<br>249-323 (75)<br>441-591 (151)<br>669-713 (45)<br>726-1091 (366)<br>1250-1276 (27)<br>1551-1619 (69)<br>1748-1769 (22)<br>1854-2066 (213)<br>2109-2442 (334) | 1-7 (7)<br>17-102 (86)<br>109-140 (32)<br>145-164 (21)<br>171-221 (51)<br>232-247 (16)<br>254-283 (30)<br>295-314 (20)<br>353-365 (13)<br>479-500 (22)<br>515-578 (64)<br>599-613 (15)<br>628-635 (8)<br>649-662 (14)<br>673-683 (11)<br>707-768 (62)<br>776-879 (104)<br>881-898 (18)<br>902-1004 (103)<br>1017-1059 (43)<br>1084-1102 (19)<br>1121-1127 (7)<br>1537-1551 (15)<br>1616-1639 (24)<br>1844-1851 (8)<br>1857-1878 (22)<br>1911-1943 (33)<br>1952-2028 (77)<br>2031-2054 (23)<br>2060-2077 (18)<br>2084-2114 (31)<br>2132-2200 (69)<br>2217-2353 (137)<br>2361-2442 (82) | 386 |
| EP300, E1A binding protein p300, p300 HAT, histone acetyltransferase p300          | Q09472 | 2,414<br>(30/52.9) | 66.49 | 61.31 | 1-37 (37)<br>84-170 (87)<br>191-269 (79)<br>282-334 (53)<br>422-458 (37)<br>478-569 (02)                                                                                                 | 1-7 (7)<br>18-135 (118)<br>173-203 (31)<br>212-226 (15)<br>233-248 (16)<br>264-295 (32)                                                                                                                                                                                                                                                                                                                                                                                                                                                                                               | 554 |

|                                                           |        |                 |       |       |                                                                                                            |                                                                                                                                                                                                                                                                                                                                                                  |     |
|-----------------------------------------------------------|--------|-----------------|-------|-------|------------------------------------------------------------------------------------------------------------|------------------------------------------------------------------------------------------------------------------------------------------------------------------------------------------------------------------------------------------------------------------------------------------------------------------------------------------------------------------|-----|
|                                                           |        |                 |       |       | 649-1054 (406)<br>1213-1233 (21)<br>1515-1582 (68)<br>1715-1739 (25)<br>1817-2044 (228)<br>2093-2414 (322) | 314-323 (10)<br>336-349 (14)<br>456-479 (24)<br>504-554 (51)<br>578-592 (15)<br>608-613 (6)<br>627-642 (16)<br>654-668 (15)<br>687-834 (148)<br>844-883 (39)<br>890-988 (99)<br>994-1010 (17)<br>1018-1023 (7)<br>1501-1515 (15)<br>1579-1603 (25)<br>1822-1848 (27)<br>1881-1908 (28)<br>1914-2063 (150)<br>2111-2191 (81)<br>2194-2314 (121)<br>2324-2414 (91) |     |
| NKX3-1, homeobox protein Nkx-3.1                          | Q99801 | 234<br>(3/50.4) | 63.67 | 59.40 | 1-133 (133)                                                                                                | 1-46 (46)<br>66-116 (51)<br>129-149 (21)                                                                                                                                                                                                                                                                                                                         | 36  |
| CDKN1A, cyclin-dependent kinase inhibitor 1               | P38936 | 164<br>(5/36.0) | 62.2  | 65.9  | 1-17 (17)<br>73-115 (43)<br>117-164 (48)                                                                   | 36-41 (6)<br>68-79 (12)<br>100-105 (6)<br>109-123 (15)<br>145-164 (20)                                                                                                                                                                                                                                                                                           | 284 |
| CREB3L2, cAMP responsive element binding protein 3-like 2 | Q70SY1 | 520<br>(8/32.3) | 61.73 | 44.04 | 61-79 (19)<br>120-139 (20)<br>149-167 (19)<br>195-265 (71)<br>303-327 (25)<br>433-452 (20)                 | 30-58 (29)<br>76-88 (13)<br>109-122 (14)<br>138-153 (16)<br>163-202 (40)<br>217-232 (16)<br>239-267 (29)<br>273-283 (11)                                                                                                                                                                                                                                         | 14  |
| CREB3L1, cAMP responsive element binding protein 3-like 1 | Q96BA8 | 519<br>(9/32.4) | 60.89 | 42.77 | 69-112 (44)<br>196-261 (66)<br>300-312 (13)<br>446-519 (74)                                                | 53-61 (9)<br>115-129 (15)<br>142-168 (27)<br>178-204 (27)<br>230-264 (35)<br>268-280 (13)<br>424-435 (12)<br>479-487 (9)<br>499-519 (21)                                                                                                                                                                                                                         | 32  |
| MDM2, E3 ubiquitin-protein ligase Mdm2                    | Q00987 | 491<br>(8/21.8) | 60.08 | 57.43 | 1-21 (21)<br>112-193 (82)<br>209-244 (36)<br>251-295 (45)<br>331-365 (35)<br>370-428 (59)                  | 100-108 (9)<br>189-208 (20)<br>235-261 (27)<br>273-284 (12)<br>296-306 (11)<br>322-329 (8)<br>359-367 (9)<br>399-409 (11)                                                                                                                                                                                                                                        | 801 |
| TCF7, transcription factor 7                              | P36402 | 384<br>(7/61.7) | 59.63 | 71.88 | 1-115 (115)<br>128-190 (63)<br>230-271 (42)<br>332-384 (53)                                                | 1-31 (31)<br>41-133 (93)<br>156-167 (12)<br>178-224 (47)<br>272-305 (34)                                                                                                                                                                                                                                                                                         | 5   |

|                                                                  |        |                  |       |       |                                                                                          |                                                                                                                                                                                                      |      |
|------------------------------------------------------------------|--------|------------------|-------|-------|------------------------------------------------------------------------------------------|------------------------------------------------------------------------------------------------------------------------------------------------------------------------------------------------------|------|
|                                                                  |        |                  |       |       |                                                                                          | 328-336 (9)<br>374-384 (11)                                                                                                                                                                          |      |
| TCF7L2, Transcription factor 7-like 2                            | Q9NQB0 | 619<br>(13/46.2) | 59.13 | 58.97 | 1-96 (96)                                                                                | 1-25 (25)<br>36-52 (17)<br>88-115 (28)<br>145-162 (18)<br>200-209 (10)<br>243-265 (23)<br>268-293 (26)<br>308-317 (10)<br>351-387 (37)<br>446-452 (7)<br>487-492 (6)<br>531-585 (55)<br>596-619 (24) | 54   |
| p53, cellular tumor antigen p53                                  | P04637 | 393<br>(8/39.4)  | 54.96 | 50.89 | 1-23 (23)<br>33-97 (65)<br>277-328 (52)<br>346-393 (46)                                  | 11-57 (47)<br>106-115 (10)<br>132-141 (10)<br>232-239 (8)<br>251-258 (8)<br>265-277 (13)<br>322-355 (34)<br>363-387 (25)                                                                             | 1072 |
| ATF4, activating transcription factor 4                          | P18848 | 351<br>(9/33.6)  | 52.14 | 57.55 | 66-77 (12)<br>131-149 (19)<br>168-194 (27)<br>207-315 (109)                              | 94-102 (9)<br>115-127 (13)<br>154-169 (16)<br>177-187 (11)<br>196-209 (14)<br>219-230 (12)<br>246-257 (12)<br>267-284 (18)<br>326-338 (13)                                                           | 79   |
| RELA, v-rel avian reticuloendotheliosis viral oncogene homolog A | Q04206 | 551<br>(12/38.5) | 49.36 | 37.93 | 39-64 (26)<br>75-92 (18)<br>273-348 (76)<br>376-398 (23)<br>414-437 (24)<br>505-530 (26) | 1-11 (11)<br>31-41 (11)<br>62-76 (15)<br>98-103 (6)<br>110-118 (9)<br>285-290 (6)<br>305-317 (13)<br>350-380 (31)<br>398-414 (17)<br>433-483 (51)<br>492-504 (13)<br>523-551 (29)                    | 397  |
| Transcription factor E2F2                                        | Q14209 | 437<br>(10/33.6) | 49.20 | 43.48 | 1-26 (26)<br>56-66 (11)<br>109-130 (22)<br>196-210 (15)<br>301-389 (89)                  | 1-9 (9)<br>37-47 (11)<br>75-82 (8)<br>135-145 (11)<br>228-235 (8)<br>248-256 (9)<br>285-307 (23)<br>319-331 (13)<br>335-349 (15)<br>364-403 (40)                                                     | 28   |
| Transcription factor E2F1                                        | Q01094 | 437<br>(10/33.4) | 48.08 | 38.90 | 37-129 (93)<br>299-356 (68)                                                              | 16-39 (24)<br>57-71 (15)<br>87-105 (19)<br>132-143 (12)<br>245-251 (7)                                                                                                                               | 28   |

|                                                           |        |                  |       |       |                                                                                                                           |                                                                                                                                                                                         |     |
|-----------------------------------------------------------|--------|------------------|-------|-------|---------------------------------------------------------------------------------------------------------------------------|-----------------------------------------------------------------------------------------------------------------------------------------------------------------------------------------|-----|
|                                                           |        |                  |       |       |                                                                                                                           | 250-265 (6)<br>281-305 (25)<br>325-332 (8)<br>345-365 (21)<br>376-384 (9)                                                                                                               |     |
| Transcription factor E2F3                                 | O00716 | 465<br>(6/28.8)  | 48.17 | 40.00 | 67-180 (114)<br>350-396 (47)<br>402-419 (18)                                                                              | 95-122 (28)<br>132-161 (30)<br>180-195 (16)<br>333-253 (21)<br>386-407 (22)<br>421-437 (17)                                                                                             | 155 |
| IGF1, insulin-like growth factor I                        | P05019 | 195<br>(2/13.8)  | 47.69 | 51.28 | 77-87 (11)<br>113-195 (83)                                                                                                | 166-177 (12)<br>181-195 (15)                                                                                                                                                            | 20  |
| PDGFB, platelet-derived growth factor subunit B           | P01127 | 241<br>(2/12.4)  | 47.30 | 33.20 | 50-65 (16)<br>67-76 (10)<br>188-241 (61)                                                                                  | 208-216 (9)<br>221-241 (21)                                                                                                                                                             | 84  |
| CREB3L3, cAMP responsive element binding protein 3-like 3 | Q68CJ9 | 461<br>(11/35.6) | 46.85 | 41.87 | 51-120 (70)<br>124-139 (16)<br>251-268 (18)<br>369-414 (46)<br>442-461 (20)                                               | 20-36 (17)<br>60-93 (34)<br>121-127 (7)<br>140-157 (18)<br>178-186 (9)<br>198-204 (7)<br>356-364 (9)<br>367-376 (10)<br>399-412 (14)<br>416-445 (30)<br>453-461 (9)                     | 15  |
| AR, androgen receptor                                     | P10275 | 919<br>(12/28.1) | 42.66 | 35.80 | 1-18 (18)<br>31-167 (137)<br>183-227 (45)<br>293-312 (20)<br>368-388 (21)<br>415-433 (19)<br>445-479 (35)<br>635-659 (25) | 1-59 (59)<br>94-112 (19)<br>118-150 (33)<br>155-194 (40)<br>236-252 (17)<br>264-273 (10)<br>342-351 (10)<br>356-368 (13)<br>391-412 (22)<br>429-447 (19)<br>476-481 (6)<br>495-504 (10) | 353 |
| CREB3L4, cAMP responsive element binding protein 3-like 4 | Q8TEY5 | 395<br>(8/23.8)  | 39.24 | 35.95 | 43-59 (17)<br>81-109 (29)<br>221-241 (21)<br>318-345 (27)<br>351-395 (45)                                                 | 1-13 (13)<br>20-31 (12)<br>65-81 (17)<br>110-121 (12)<br>135-143 (9)<br>180-188 (9)<br>368-377 (10)<br>384-395 (12)                                                                     | 6   |
| PIK3R5, phosphoinositide 3-kinase regulatory subunit 5    | Q8WYR1 | 880<br>(7/13.6)  | 36.7  | 29.2  | 312-349 (38)<br>351-370 (20)<br>386-418 (33)<br>437-515 (79)<br>563-603 (41)<br>783-793 (11)<br>838-858 (21)              | 339-364 (26)<br>371-387 (17)<br>420-435 (16)<br>451-463 (13)<br>485-495 (11)<br>516-536 (21)<br>547-562 (16)                                                                            | 8   |
| NFKBIA, NF-kappa-B inhibitor alpha                        | P25963 | 317<br>(3/9.8)   | 35.65 | 26.81 | 1-42 (42)<br>52-67 (16)<br>280-298 (19)                                                                                   | 1-6 (6)<br>76-64 (9)<br>302-317 (16)                                                                                                                                                    | 203 |
| PIK3R2, phosphoinositide-3-                               | O00459 | 728<br>(12/)     | 34.07 | 27.65 | 81-120 (40)<br>140-153 (14)                                                                                               | 29-43 (15)<br>70-84 (15)                                                                                                                                                                | 148 |

|                                                                   |        |                   |       |       |                                                                                                                           |                                                                                                                                                           |     |
|-------------------------------------------------------------------|--------|-------------------|-------|-------|---------------------------------------------------------------------------------------------------------------------------|-----------------------------------------------------------------------------------------------------------------------------------------------------------|-----|
| kinase regulatory subunit 2                                       |        |                   |       |       | 189-213 (25)<br>251-285 (35)<br>289-324 (36)<br>544-560 (17)<br>714-728 (15)                                              | 109-118 (10)<br>122-136 (15)<br>169-183 (15)<br>218-231 (14)<br>241-256 (16)<br>277-298 (22)<br>312-320 (9)<br>325-335 (11)<br>395-400 (6)<br>574-581 (8) |     |
| BRAF, B-Raf proto-oncogene, serine/threonine kinase               | P15056 | 766<br>(8/17.1)   | 34.07 | 31.07 | 1-40 (41)<br>110-132 (23)<br>141-156 (16)<br>305-455 (151)                                                                | 16-21 (6)<br>46-67 (22)<br>78-86 (9)<br>130-135 (6)<br>326-332 (7)<br>339-347 (9)<br>356-419 (64)<br>467-474 (8)                                          | 83  |
| PDGF-1 (PDGFA), platelet-derived growth factor subunit A          | P04085 | 211<br>(0/0)      | 33.18 | 28.44 | 61-82 (22)<br>181-211 (31)                                                                                                | N.P. <sup>g</sup>                                                                                                                                         | 19  |
| CREB3, cyclic AMP-responsive element-binding protein 3            | O43889 | 395<br>(2/4.6)    | 31.1  | 12.9  | 120-131 (12)<br>182-196 (15)                                                                                              | 11-17 (7)<br>105-115 (11)                                                                                                                                 | 158 |
| ARAF, Proto-oncogene A-Raf, serine/threonine-protein kinase A-Raf | P10398 | 606<br>(2/11.4)   | 29.37 | 29.04 | 1-17 (17)<br>156-224 (69)<br>231-294 (64)<br>579-595 (17)                                                                 | 193-247 (55)<br>290-303 (14)                                                                                                                              | 94  |
| PIK3R1, phosphoinositide-3-kinase regulatory subunit 1            | P27986 | 712<br>(8/8.3)    | 28.37 | 12.57 | 78-112 (35)<br>301-322 (22)<br>608-631 (24)                                                                               | 7-12 (6)<br>26-43 (18)<br>69-79 (11)<br>112-119 (8)<br>131-136 (6)<br>331-336 (6)<br>580-585 (6)<br>657-662 (6)                                           | 356 |
| PIK3R3, phosphoinositide-3-kinase regulatory subunit 3            | Q92569 | 461<br>(3/5.4)    | 28.42 | 6.29  | 39-53 (15)                                                                                                                | 23-31 (9)<br>218-226 (9)<br>257-263 (7)                                                                                                                   | 142 |
| RB1, retinoblastoma-associated protein                            | P06400 | 928<br>(7/10.6)   | 28.02 | 25.32 | 1-48 (48)<br>246-261 (16)<br>348-367 (20)<br>577-590 (14)<br>609-635 (27)<br>775-786 (12)<br>816-827 (12)<br>859-928 (70) | 7-20 (14)<br>41-49 (9)<br>57-64 (8)<br>830-840 (11)<br>844-860 (17)<br>872-881 (10)<br>891-919 (29)                                                       | 315 |
| BCL2, B-cell CLL/lymphoma 2, apoptosis regulator Bcl-2            | P10415 | 239<br>(2/10.9)   | 27.20 | 25.52 | 39-87 (49)                                                                                                                | 13-32 (20)<br>46-51 (6)                                                                                                                                   | 137 |
| SOS1, Son of sevenless homolog 1                                  | Q07889 | 1,333<br>(8/16.7) | 26.86 | 26.48 | 656-665 (10)<br>744-757 (14)<br>1019-1120 (102)<br>1125-1333 (209)                                                        | 1005-1014 (10)<br>1027-1037 (11)<br>1058-1070 (13)<br>1094-1146 (53)<br>1166-1181 (16)<br>1188-1205 (18)<br>1218-1254 (37)                                | 82  |

|                                                                    |        |                    |       |       |                                                                           |                                                                                                                                                                              |     |
|--------------------------------------------------------------------|--------|--------------------|-------|-------|---------------------------------------------------------------------------|------------------------------------------------------------------------------------------------------------------------------------------------------------------------------|-----|
|                                                                    |        |                    |       |       |                                                                           | 1269-1333 (65)                                                                                                                                                               |     |
| CCNE1, G1/S-specific cyclin-E1                                     | P24864 | 410<br>(5/11.2)    | 26.59 | 22.93 | 1-45 (46)<br>78-87 (10)<br>377-410 (34)                                   | 21-26 (6)<br>31-42 (12)<br>64-74 (11)<br>370-379 (10)<br>389-395 (7)                                                                                                         | 83  |
| PDPK1, 3-phosphoinositide-dependent protein kinase 1               | O15530 | 556<br>(4/11.3)    | 26.4  | 18.4  | 1-10 (10)<br>24-82 (59)<br>389-412 (24)                                   | 1-29 (29)<br>48-53 (6)<br>82-98 (17)<br>376-386 (11)                                                                                                                         | 92  |
| MAP2K1, dual specificity mitogen-activated protein kinase kinase 1 | Q02750 | 393<br>(4/7.9)     | 24.7  | 17.6  | 1-28 (28)<br>281-303 (23)<br>383-393 (11)                                 | 8-16 (9)<br>30-36 (7)<br>272-279 (8)<br>310-316 (7)                                                                                                                          | 121 |
| GSK3B, GSK3 $\beta$ , glycogen synthase kinase-3 beta              | P49841 | 420<br>(7/15.0)    | 24.05 | 22.38 | 1-54 (54)<br>382-420 (39)                                                 | 9-17 (9)<br>21-26 (6)<br>316-321 (6)<br>333-341 (8)<br>358-366 (9)<br>371-388 (17)<br>411-417 (7)                                                                            | 343 |
| RAF1, Raf-1 proto-oncogene, serine/threonine kinase                | P04049 | 648<br>(3/6.3)     | 23.92 | 26.54 | 39-55 (17)<br>218-335 (118)<br>636-648 (13)                               | 262-289 (28)<br>291-296 (6)<br>340-346 (7)                                                                                                                                   | 231 |
| SOS2, SOS Ras/Rho guanine nucleotide exchange factor 2             | Q07890 | 1,332<br>(10/13.7) | 23.87 | 23.12 | 742-757 (16)<br>1017-1064 (48)<br>1075-1100 (26)<br>1140-1332 (193)       | 460-465 (6)<br>1003-1012 (10)<br>1030-1035 (6)<br>1063-1074 (12)<br>1098-1141 (44)<br>1155-1168 (14)<br>1188-1200 (13)<br>1223-1255 (33)<br>1270-1285 (16)<br>1302-1329 (28) | 29  |
| MAP2K2, dual specificity mitogen-activated protein kinase kinase 2 | P36507 | 400<br>(5/14.0)    | 22.75 | 18.50 | 1-10 (10)<br>13-34 (22)<br>282-311 (30)                                   | 1-16 (16)<br>251-250 (10)<br>315-325 (11)<br>342-351 (10)<br>379-387 (9)                                                                                                     | 55  |
| Enpl (HSP90B1), endoplasmic                                        | P14625 | 803<br>(4/10.2)    | 22.29 | 17.81 | 30-50 (21)<br>286-326 (41)<br>598-608 (11)<br>747-803 (57)                | 331-338 (8)<br>646-651 (6)<br>711-753 (43)<br>779-803 (24)                                                                                                                   | 188 |
| HSP90AA1, heat shock protein HSP 90-alpha                          | P07900 | 732<br>(3/4.9)     | 21.90 | 23.2  | 1-18 (18)<br>166-181 (16)<br>223-288 (66)<br>547-565 (19)<br>698-732 (35) | 208-223 (16)<br>594-602 (9)<br>688-698 (11)                                                                                                                                  | 892 |
| HSP90AB1, heat shock protein 90kDa alpha family class B member 1   | P08238 | 724<br>(3/4.8)     | 21.82 | 20.99 | 218-278 (61)<br>239-255 (17)<br>693-724 (32)                              | 205-218 (14)<br>585-594 (10)<br>681-691 (11)                                                                                                                                 | 694 |
| FGFR1, fibroblast growth factor receptor 1                         | P11362 | 822<br>(8/9.6)     | 20.32 | 18.98 | 23-33 (11)<br>80-89 (10)<br>105-160 (56)<br>777-822 (46)                  | 93-106 (14)<br>110-122 (13)<br>150-155 (6)<br>165-177 (13)<br>208-216 (9)<br>754-760 (7)<br>766-773 (8)                                                                      | 108 |

|                                                                                                            |        |                  |       |       |                                                                                                         |                                                                                                                   |     |
|------------------------------------------------------------------------------------------------------------|--------|------------------|-------|-------|---------------------------------------------------------------------------------------------------------|-------------------------------------------------------------------------------------------------------------------|-----|
|                                                                                                            |        |                  |       |       |                                                                                                         | 812-820 (9)                                                                                                       |     |
| NFKB1, nuclear factor NF-kappa-B p105 subunit                                                              | P19838 | 968<br>(5/6.7)   | 20.25 | 20.14 | 1-10 (11)<br>66-78 (13)<br>359-405 (47)<br>420-453 (34)<br>463-480 (18)<br>892-924 (33)<br>946-968 (23) | 369-374 (6)<br>403-421 (19)<br>454-463 (10)<br>781-787 (7)<br>931-953 (23)                                        | 590 |
| PTEN, phosphatidylinositol 3,4,5-trisphosphate 3-phosphatase and dual-specificity protein phosphatase PTEN | P60484 | 403<br>(2/5.5)   | 19.60 | 16.63 | 351-403 (53)                                                                                            | 336-350 (15)<br>397-403 (7)                                                                                       | 241 |
| IKKB, inhibitor of nuclear factor kappa-B kinase subunit beta                                              | O14920 | 756<br>(4/5.7)   | 18.78 | 13.10 | 1-9 (10)<br>400-409 (10)<br>549-562 (14)<br>572-586 (15)<br>666-706 (41)                                | 384-392 (9)<br>655-664 (10)<br>709-723 (15)<br>734-742 (9)                                                        | 195 |
| PDGFC, platelet-derived growth factor subunit C                                                            | Q9NRA1 | 345<br>(0/0)     | 18.60 | 11.88 | 20-31 (12)<br>33-46 (14)                                                                                | N.P.                                                                                                              | 8   |
| AKT3, RAC-gamma serine/threonine-protein kinase                                                            | Q9Y243 | 479<br>(2/4.2)   | 17.1  | 16.7  | 109-140 (32)<br>445-479 (35)                                                                            | 72-82 (11)<br>469-477 (9)                                                                                         | 34  |
| TGFA, transforming growth factor alpha                                                                     | P01135 | 160<br>(0/0)     | 16.88 | 5.00  | N.P.                                                                                                    | N.P.                                                                                                              | 18  |
| BCL-1 (CCND1), G1/S-specific cyclin-D1                                                                     | P24385 | 295<br>(0/0)     | 16.61 | 13.90 | 258-295 (38)                                                                                            | N.P.                                                                                                              | 124 |
| Insulin                                                                                                    | P01308 | 110<br>(0/0)     | 16.36 | 0.91  | N.P.                                                                                                    | N.P.                                                                                                              | 27  |
| AKT1, RAC-alpha serine/threonine-protein kinase                                                            | P31749 | 480<br>(3/6.0)   | 16.33 | 19.38 | 111-140 (30)<br>424-433 (10)<br>449-480 (32)                                                            | 73-84 (12)<br>441-447 (7)<br>471-480 (10)                                                                         | 366 |
| CCNE2, G1/S-specific cyclin-E2                                                                             | O96020 | 404<br>(2/3.7)   | 16.10 | 16.58 | 1-49 (49)<br>387-404 (18)                                                                               | 1-9 (9)<br>26-31 (6)                                                                                              | 21  |
| CASP9, Caspase-9                                                                                           | P55211 | 416<br>(2/3.1)   | 15.11 | 13.46 | 117-133 (17)<br>294-321 (28)                                                                            | 71-77 (7)<br>281-286 (6)                                                                                          | 59  |
| CTNB1, Catenin beta-1                                                                                      | P35222 | 781<br>(8/14.7)  | 14.98 | 18.18 | 17-27 (11)<br>30-59 (30)<br>547-557 (11)<br>709-724 (16)<br>727-773 (47)                                | 1-14 (14)<br>22-38 (17)<br>60-75 (16)<br>96-101 (6)<br>133-140 (8)<br>695-702 (8)<br>719-739 (12)<br>748-781 (34) | 452 |
| FGFR2, fibroblast growth factor receptor 2                                                                 | P21802 | 821<br>(4/4.3)   | 14.25 | 14.01 | 31-45 (15)<br>142-156 (15)<br>405-414 (10)<br>429-450 (22)<br>776-821 (46)                              | 117-126 (10)<br>171-178 (8)<br>488-498 (11)<br>756-761 (6)                                                        | 92  |
| IGF1R, insulin-like growth factor 1 receptor                                                               | P08069 | 1,367<br>(8/6.6) | 14.05 | 11.85 | 1-10 (10)<br>466-483 (18)<br>737-768 (32)<br>1284-1367 (84)                                             | 521-527 (7)<br>720-732 (13)<br>793-803 (11)<br>815-823 (9)<br>862-867 (6)<br>1308-1316 (9)                        | 112 |



|                                                                                          |        |                  |       |       |                                                                                        |                                                                                                        |      |
|------------------------------------------------------------------------------------------|--------|------------------|-------|-------|----------------------------------------------------------------------------------------|--------------------------------------------------------------------------------------------------------|------|
|                                                                                          |        |                  |       |       |                                                                                        | 1330-1352 (23)<br>1356-1367 (12)                                                                       |      |
| PDGFRB; platelet derived growth factor receptor beta                                     | P09619 | 1,106<br>(5/8.5) | 13.47 | 13.56 | 66-78 (13)<br>422-438 (15)<br>463-477 (15)<br>701-712 (12)<br>1019-1106 (88)           | 447-452 (6)<br>1003-1013 (11)<br>1017-1027 (11)<br>1035-1066 (32)<br>1073-1106 (34)                    | 133  |
| PDGFD, platelet-derived growth factor subunit D                                          | Q9GZP0 | 370<br>(0/0)     | 11.89 | 5.95  | 190-200 (11)                                                                           | N.P.                                                                                                   | 20   |
| MAPK3, Mitogen-activated protein kinase 3                                                | P27361 | 379<br>(0/0)     | 11.87 | 9.23  | 1-27 (27)                                                                              | N.P.                                                                                                   | 276  |
| PDGFRA, PDGFR- $\alpha$ (CD140 $\alpha$ ), platelet-derived growth factor receptor alpha | P16234 | 1,089<br>(4/5.0) | 11.11 | 9.27  | 61-71 (11)<br>1017-1089 (73)                                                           | 133-139 (7)<br>1013-1025 (13)<br>1052-1061 (10)<br>1066-1089 (24)                                      | 61   |
| AKT2, RAC-beta serine/threonine-protein kinase                                           | P31751 | 481<br>(1/2.5)   | 11.02 | 10.81 | 41-50 (10)<br>113-137 (25)                                                             | 73-84 (12)                                                                                             | 75   |
| INSRR, insulin receptor-related receptor                                                 | P14616 | 1,297<br>(3/3.3) | 10.72 | 12.10 | 462-477 (16)<br>664-696 (33)<br>732-762 (31)<br>1074-1087 (14)<br>1265-1297 (33)       | 707-730 (24)<br>799-805 (7)<br>1253-1264 (12)                                                          | 4    |
| PIK3CG, phosphatidylinositol-4,5-bisphosphate 3-kinase catalytic subunit gamma           | P48736 | 1,102<br>(1/1.2) | 10.71 | 8.44  | 21-31 (11)<br>440-455 (16)<br>490-510 (21)<br>528-547 (20)                             | 516-528 (13)                                                                                           | 40   |
| EGFR, epidermal growth factor receptor                                                   | P00533 | 1,210<br>(6/9.7) | 9.1   | 12.4  | 1024-1038 (15)<br>1070-1082 (13)<br>1094-1139 (46)<br>1157-1181 (25)<br>1201-1210 (10) | 1016-1023 (8)<br>1048-1069 (22)<br>1080-1095 (16)<br>1105-1112 (8)<br>1132-1180 (49)<br>1197-1210 (14) | 1031 |
| GSTP1, glutathione S-transferase pi 1                                                    | P09211 | 210<br>(0/0)     | 9.05  | 4.29  | N.P.                                                                                   | N.P.                                                                                                   | 61   |
| GRB2, growth factor receptor-bound protein 2                                             | P62993 | 212<br>(0/0)     | 9.0   | 3.7   | N.P.                                                                                   | N.P.                                                                                                   | 998  |
| MTOR, mechanistic target of rapamycin, serine/ threonine-protein kinase mTOR             | P42345 | 2,549<br>(4/1.3) | 8.9   | 8.0   | 1-18 (18)<br>910-930 (21)<br>1815-1866 (52)<br>2437-2491 (55)                          | 19-27 (9)<br>263-272 (10)<br>298-304 (7)<br>1748-1754 (7)                                              | 175  |
| HRAS (p21ras), Harvey rat sarcoma viral oncogene homolog                                 | P01112 | 189<br>(1/3.2)   | 8.47  | 9.52  | 170-181 (12)                                                                           | 78-83 (6)                                                                                              | 165  |
| SRD5A2, 3-oxo-5-alpha-steroid 4-dehydrogenase 2                                          | P31213 | 254<br>(0/0)     | 8.27  | 3.54  | N.P.                                                                                   | N.P.                                                                                                   | N.P. |
| MAPK1, mitogen-activated protein kinase 1                                                | P28482 | 360<br>(0/0)     | 8.1   | 5.3   | N.P.                                                                                   | N.P.                                                                                                   | 329  |
| PK3CD,                                                                                   | O00329 | 1,044            | 7.76  | 6.99  | 285-313 (29)                                                                           | N.P.                                                                                                   | 22   |

|                                                                                                         |        |                  |      |       |                                                    |                                                                      |     |
|---------------------------------------------------------------------------------------------------------|--------|------------------|------|-------|----------------------------------------------------|----------------------------------------------------------------------|-----|
| phosphatidylinositol-4,5-bisphosphate 3-kinase catalytic subunit delta                                  |        | (0/0)            |      |       | 404-414 (11)<br>448-461 (14)                       |                                                                      |     |
| IKKA (CHUK), inhibitor of nuclear factor kappa-B kinase subunit alpha                                   | O15111 | 745<br>(2/2.6)   | 7.38 | 6.31  | 1-15 (16)                                          | 713-723 (11)<br>738-745 (8)                                          | 186 |
| CDK2, cyclin-dependent kinase 2                                                                         | P24941 | 298<br>(0/0)     | 7.05 | 4.36  | N.P.                                               | N.P.                                                                 | 710 |
| EGF, pro-epidermal growth factor                                                                        | P01133 | 1,207<br>(4/5.4) | 6.96 | 11.18 | 1062-1094 (33)<br>1108-1136 (29)<br>1168-1207 (40) | 1093-1104 (12)<br>1135-1155 (20)<br>1157-1172 (16)<br>1181-1197 (17) | 26  |
| KRAS, Kirsten rat sarcoma viral oncogene homolog                                                        | P01116 | 189<br>(1/3.7)   | 6.34 | 1.06  | N.P.                                               | 78-84 (7)                                                            | 95  |
| NRAS, neuroblastoma RAS viral (v-ras) oncogene homolog                                                  | P01111 | 189<br>(0/0)     | 3.70 | 5.29  | 172-178 (7)                                        | N.P.                                                                 | 72  |
| PIK3CB, PI3K- $\beta$ , phosphatidylinositol 4,5-bisphosphate 3-kinase catalytic subunit beta isoform   | P42338 | 1,070<br>(0/0)   | 3.36 | 2.06  | N.P.                                               | N.P.                                                                 | 53  |
| PIK3CA, PI3K- $\alpha$ , phosphatidylinositol 4,5-bisphosphate 3-kinase catalytic subunit alpha isoform | P42336 | 1,068<br>(0/0)   | 3.00 | 2.06  | N.P.                                               | N.P.                                                                 | 101 |
| PSA, prostate-specific antigen or KLK3, kallikrein related peptidase 3                                  | P07288 | 261<br>(0/0)     | 2.68 | 1.53  | N.P.                                               | N.P.                                                                 | 20  |

<sup>a</sup>  $N_{AIBS}$  (A/B) represents the number of potential disorder-based binding sites identified by the ANCHOR algorithm (A) and the percentage of residues involved in disorder-based interactions (B).

<sup>b</sup> Content of disordered residues (i.e., residues with the disorder propensity  $\geq 0.5$ ) in a protein based on the PONDR-FIT disorder prediction.

<sup>c</sup> Content of predicted disordered residues in a protein based on the MobiDB consensus score.

<sup>d</sup> Information on long disordered regions (i.e., disordered regions of at least 10 residues) was obtained based on the MobiDB consensus profile.

<sup>e</sup> AIBSs are potential disorder-based binding sites identified by the ANCHOR algorithm.

<sup>f</sup>  $N_{int}$ , number of interactions as found using the Agile Protein Interactomes DataServer (<http://cicblade.dep.usal.es:8080/APID/init.action>).

<sup>g</sup> N.P., not present. This annotation is used for proteins that do not have predicted AIBSs or long disordered regions.
